# Supplementary material
Source: HighWire-hosted journal article supplement (https://bmjopen.bmj.com/content/11/10/e051519)
Supplement: inline-supplementary-material-1 [file inline-supplementary-material-1.pdf]

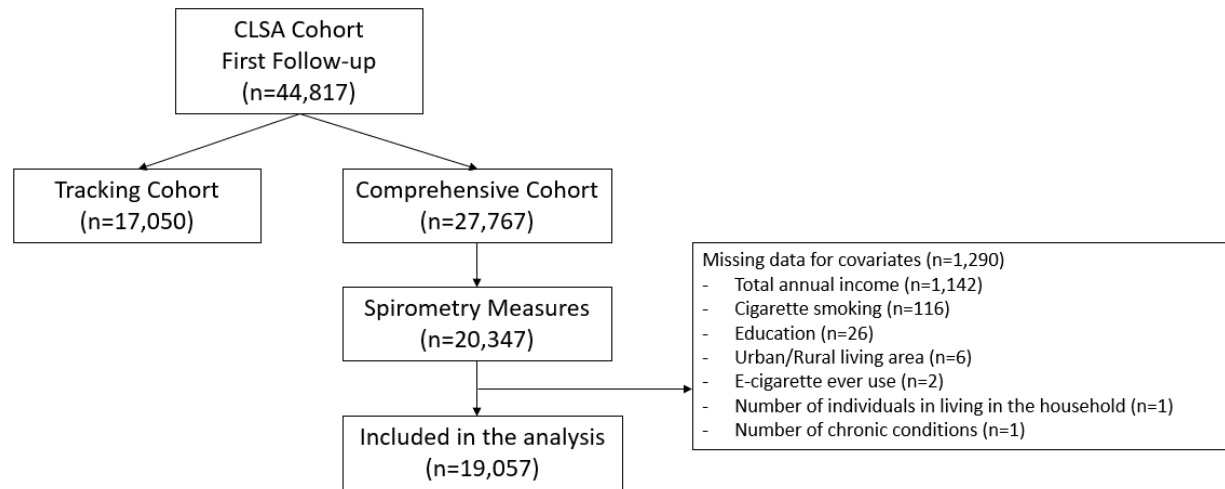

**Figure S1: Flow of study participants in the first follow-up of the Canadian Longitudinal Study on Aging (CLSA)**

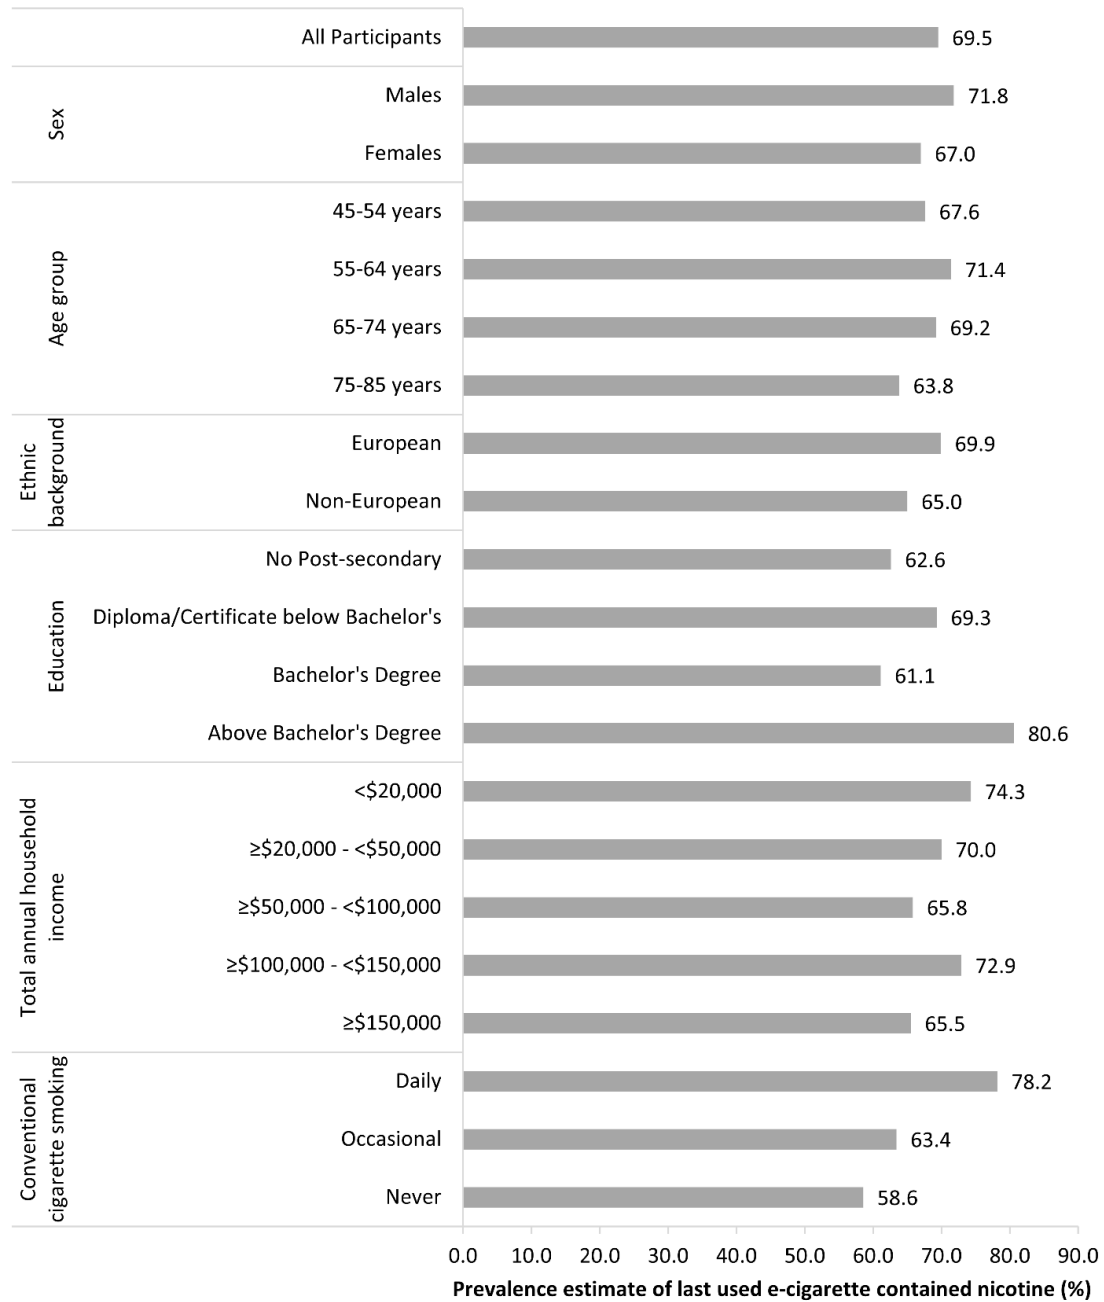

**Figure S2: Percentage of adults who indicated their last used e-cigarette contained nicotine by demographic factors and cigarette smoking status**

**Table S1: Comparison of participants with acceptable grade on spirometry and those with missing spirometry data**

|                                      | Included in the analysis<br>n (%) | Not included in the<br>analysis*<br>n (%) | p-value |
|--------------------------------------|-----------------------------------|-------------------------------------------|---------|
| <b>Age</b>                           |                                   |                                           | <.0001  |
| 45-54                                | 3569<br>(17.5)                    | 503<br>(12.2)                             |         |
| 55-64                                | 7132<br>(34.9)                    | 1160<br>(28.2)                            |         |
| 65-74                                | 5990<br>(29.3)                    | 1192<br>(28.9)                            |         |
| 75-85                                | 3727<br>(18.3)                    | 1266<br>(30.7)                            |         |
| <b>Sex</b>                           |                                   |                                           | <.0001  |
| Male                                 | 9769<br>(47.8)                    | 2249<br>(54.6)                            |         |
| Female                               | 10649<br>(52.2)                   | 1872<br>(45.4)                            |         |
| <b>Education</b>                     |                                   |                                           | <.0001  |
| No post-secondary education          | 868<br>(4.3)                      | 282<br>(6.8)                              |         |
| Diploma/certificate below bachelor's | 1766<br>(8.7)                     | 438<br>(10.7)                             |         |
| Bachelor's degree                    | 1423<br>(7.0)                     | 349<br>(8.5)                              |         |
| Above bachelor's degree              | 16334<br>(80.1)                   | 3043<br>(74.0)                            |         |
| <b>Annual household income</b>       |                                   |                                           | <.0001  |
| < \$20,000                           | 740<br>(3.8)                      | 274<br>(7.3)                              |         |
| \$20,000 - <50,000                   | 3850<br>(20.0)                    | 978<br>(26.2)                             |         |
| \$50,000 - <100,000                  | 7001<br>(36.33)                   | 1335<br>(35.8)                            |         |
| \$100,000 - <150,000                 | 3995<br>(20.7)                    | 631<br>(16.9)                             |         |
| ≥ \$150,000                          | 3685<br>(19.1)                    | 516<br>(13.8)                             |         |
| <b>Cigarette smoking</b>             |                                   |                                           | <.0001  |
| Never                                | 9929<br>(48.9)                    | 1967<br>(48.1)                            |         |
| 0-14 pack-years                      | 6418<br>(31.6)                    | 1208<br>(29.5)                            |         |
| ≥ 15 pack-years                      | 3954<br>(19.5)                    | 919<br>(22.4)                             |         |
| <b>E-cigarette ever use</b>          |                                   |                                           | 0.0569  |
| Yes                                  | 927<br>(4.5)                      | 215<br>(5.2)                              |         |
| No                                   | 19489<br>(95.5)                   | 3899<br>(94.8)                            |         |

\*Participants with contraindications are excluded. Proportions in the table are unweighted estimates.
